# Supplementary material for: Chiral zirconia magnetic microspheres as a new recyclable selector for the discrimination of racemic drugs
Source: Royal Society of Chemistry journal article supplement (doi:10.1039/c3tb20826e), 2013-01-01
Supplement: c3tb20826e.pdf [file c3tb20826e.pdf]

## Electronic supplementary information (ESI)

### Preparation of Fe<sub>3</sub>O<sub>4</sub>@C magnetic microspheres

The Fe<sub>3</sub>O<sub>4</sub>@C magnetic microspheres were synthesized by hydrothermal reaction of glucose on Fe<sub>3</sub>O<sub>4</sub> magnetic microspheres as per the described method with slight modification.<sup>1</sup> In briefly, added 100 mg of dried Fe<sub>3</sub>O<sub>4</sub> microspheres into a 50 mL of 0.1 M HNO<sub>3</sub> and ultrasonicated for 15-20 min followed by washing with deionized water and separated by magnetic decantation. The acid treated magnetic microspheres were dispersed in 50 mL of aqueous 0.5 M glucose solution via vigorous stirring for 20 min. The resultant Fe<sub>3</sub>O<sub>4</sub> microspheres-glucose suspension was sealed in a Teflon-lined stainless-steel autoclave and heated to and maintained at 180 °C for 4 h and then allowed to cool to room temperature. The obtained black colored suspended Fe<sub>3</sub>O<sub>4</sub>@C magnetic microspheres were washed several times with water and ethanol, respectively, and separated by magnetic decantation. Finally, the Fe<sub>3</sub>O<sub>4</sub>@C magnetic microspheres were oven dried at 80 °C for 6-8 h.

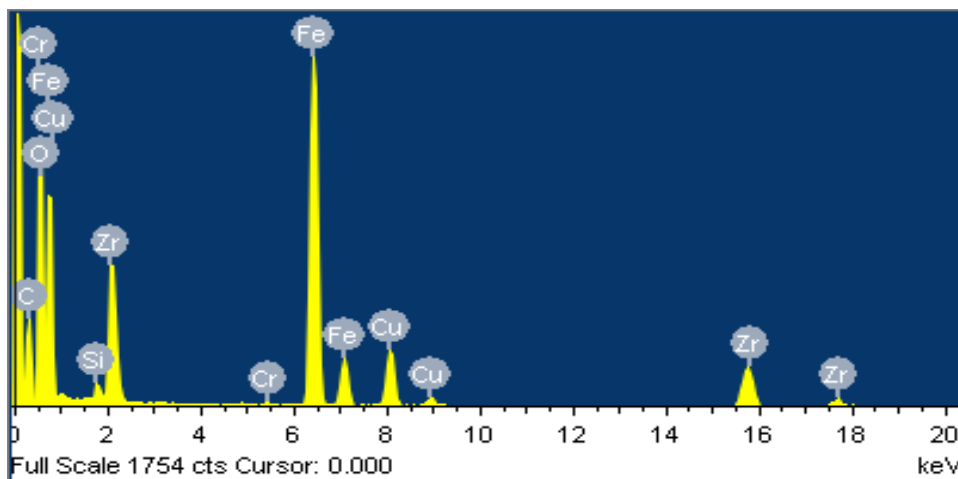

**Fig. S1.** The energy-dispersive X-ray analysis (EDAX) of Fe<sub>3</sub>O<sub>4</sub>@ZrO<sub>2</sub> magnetic microspheres

### Synthesis of cellulose tris(3,5-dimethylphenylcarbamate) (CDMPC)

The CDMPC was prepared as per the reported method.<sup>2</sup> The cellulose powder (1 g) was dried in a vacuum oven at 100 °C for 4 h to remove the chemically absorbed water. Dried cellulose was refluxed in 25 mL of dry pyridine for 12 h. After cooling the mixture to room temperature, an excess of 3,5-dimethylphenyl isocyanate was added dropwise to the cellulose suspension under constant magnetic stirring and the reaction was continued at 100 °C for 24 h under reflux. The final product, dark amber viscous, mostly homogeneous liquid, was cooled to room temperature. The product was isolated as the methanol-insoluble fraction and purified by reprecipitation from an acetone solution. The white solid was vacuum filtered, washed several times with methanol, and dried in air, then under vacuum to a constant weight. <sup>1</sup>H-NMR (300 MHz) spectrum of CDMPC expressed the following characteristic absorptions: 8.0-8.5 (H of amide groups), 2.7-5.1 (H of cellulose ring and methylene in position 6), 2-2.3 ppm (H of CH<sub>3</sub>-aryl groups).

### FT-IR Spectra of Fe<sub>3</sub>O<sub>4</sub>@C and Fe<sub>3</sub>O<sub>4</sub>@ZrO<sub>2</sub>

The FT-IR spectrum of Fe<sub>3</sub>O<sub>4</sub>@C (Fig. 2) shows the characteristic absorption band of Fe–O bond at 576 cm<sup>-1</sup>. Apart from that new absorption peaks at 1700 and 1618 cm<sup>-1</sup> which are attributed to C=O and C=C, respectively, proving the carbonization of glucose on hydrothermal reaction. The IR spectral frequencies between 1400-1200 corresponds to hydrophilic groups of –C–O stretching and –OH bending vibrations, suggesting their high adsorption. These hydrophilic groups can enhance the affinity between the microspheres and the prehydrolyzed zirconium isopropoxide. The FT-IR spectrum of the as-synthesized Fe<sub>3</sub>O<sub>4</sub>@ZrO<sub>2</sub> microspheres (Fig. 2) shows a new absorption band corresponding to the characteristic absorption of zirconia at ~634 cm<sup>-1</sup> was observed, which further confirmed the successful formation of Fe<sub>3</sub>O<sub>4</sub>@ZrO<sub>2</sub> magnetic microspheres.

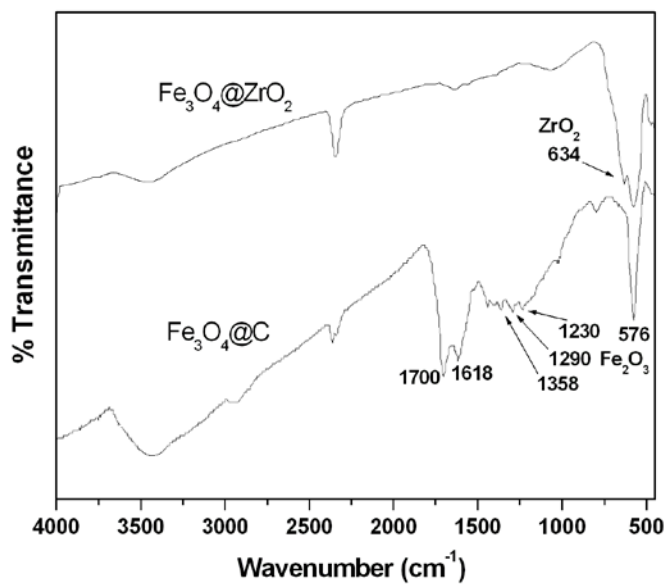

**Fig. S2.** FT-IR spectra of Fe<sub>3</sub>O<sub>4</sub>@C and Fe<sub>3</sub>O<sub>4</sub>@ZrO<sub>2</sub>

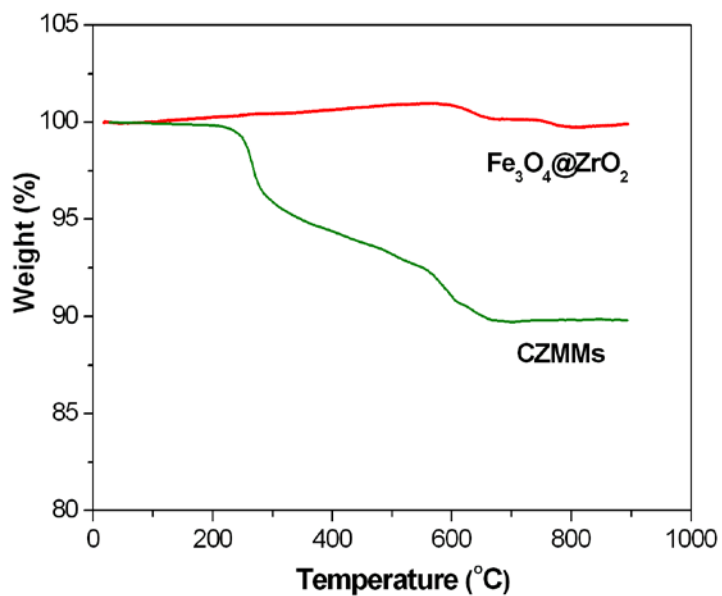

**Fig. S3.** TGA curves of Fe<sub>3</sub>O<sub>4</sub>@ZrO<sub>2</sub> and CZMMs.

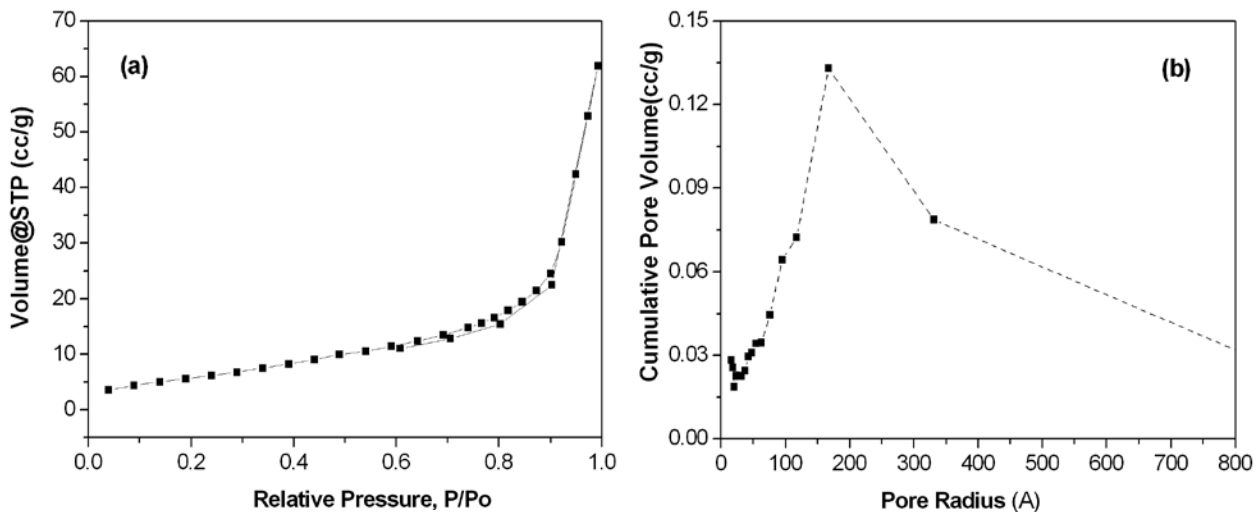

**Fig. S4.** (a) Nitrogen adsorption/desorption isotherm and (b) pore size distribution of CZMMs

### Structures of chiral drugs

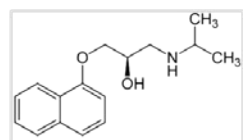

Propranolol

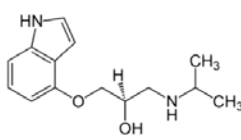

Pindolol

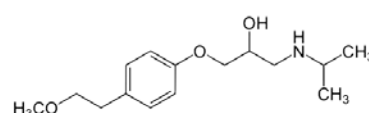

Metoprolol

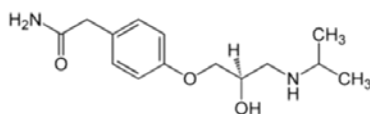

Atenolol

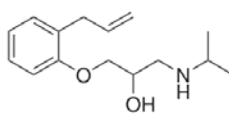

Alprenolol

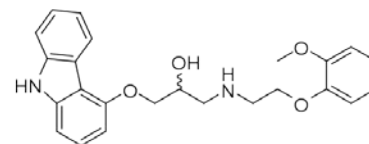

Carvedilol

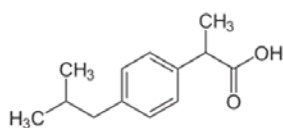

Ibuprofen

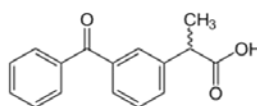

Ketoprofen

**Table S1.** Separation of ibuprofen enantiomers on CZMMs at different pHs

| pH   | Measured optical rotation <sup>a,b</sup> |                                                                      |
|------|------------------------------------------|----------------------------------------------------------------------|
|      | Racemic ibuprofen                        | Supernatant of racemic ibuprofen collected after isolated from CZMMs |
| 2.0  | -0.004                                   | -13.14                                                               |
| 4.5  | 0.002                                    | -14.20                                                               |
| 7.5  | 0.002                                    | -15.12                                                               |
| 10.0 | 0.000                                    | -15.45                                                               |

<sup>a</sup>  $[\alpha]_{\text{D}}^{22}$  deg cm<sup>2</sup> g (3 mg mL<sup>-1</sup> in 0.025 M ammonium acetate buffer)

<sup>b</sup> Average of three determinations

## References

1. Y. Li, T. H. Leng, H. Q. Lin, C. H. Deng, X. Q. Xu, N. Yao, P. Y. Yang and X. M. Zhang, J. *Proteome Res.*, 2007, **6**, 4498–4510.
2. Y. Okamoto, M. Kawashima and K. Hatada, *J. Chromatogr.* 1986, **363**, 173–186.
